# Supplementary material
Source: publisher site journal article supplement (https://www.dovepress.com/article/602800)
Supplement: Supplementary file 1 [file 602800%20Supplementary%20Materials.docx]

**Supplementary Table 1** Outcome measures and timing of evaluation

Subjective ocular refraction was assessed using a computerized optotype system (YANG SMART, SIFI S.p.A., Catania, Italy), a computerized optotype system routinely used in our clinical setting during the study period.

Optical biometry was performed using the IOLMaster 700 (Carl Zeiss Meditec AG, Jena, Germany), a swept-source OCT–based device introduced in 2014 and progressively adopted in clinical practice during the study period.

Corneal topography, asphericity, and corneal aberrometry were assessed using a Scheimpflug–Placido topography system (Sirius, CSO, Florence, Italy).

Defocus curves were measured using ETDRS optotypes presented on a computerized visual acuity system (YANG SMART, SIFI S.p.A., Catania, Italy) at a testing distance of 4 meters

| Outcome measures | Timing of evaluation | | |
| --- | --- | --- | --- |
|  | Preoperative | 1-2 months follow-up | 24 months follow-up |
| Subjective refraction (sphere, cylinder, sphere equivalent) | ✓ | ✓ | ✓ |
| Defocus curve |  | ✓  Monocular | ✓  Binocular |
| Monocular and binocular Uncorrected Distance Visual Acuity (UDVA) and Corrected Distance Visual Acuity (CDVA) |  |  | ✓ |
| Monocular and binocular Distance Corrected Near Visual Acuity (DCNVA) |  | ✓ | ✓ |
| Monocular and binocular Uncorrected Intermediate Visual Acuity (UIVA) at 100 cm and 63 cm |  |  | ✓ |
| Monocular and binocular Distance Corrected Intermediate Visual Acuity (DCIVA) at 100 cm and 63 cm |  |  | ✓ |
| Monocular and binocular Uncorrected Near Visual Acuity (UNVA) at 40 cm |  |  | ✓ |
| Monocular and Binocular DCNVA at 40 cm |  |  | ✓ |
| Distance-corrected contrast sensitivity (CS) |  | ✓  Monocular | ✓  Binocular |
| Binocular reading performance |  | ✓ | ✓ |
| Halo finding |  | ✓ | ✓ |
| Visual Function Questionnaire VF-11R |  |  | ✓ |
| Postoperative Complications |  |  | ✓ |
| Subjective Posterior Capsule Opacification (PCO) |  |  | ✓ |
| Posterior Capsulotomy |  |  | ✓ |
| Adverse Events (AEs) including Secondary Surgical Interventions (SSIs) |  | ✓ | ✓ |
| Device Deficiencies |  | ✓ | ✓ |
| Photic Phenomena Assessment |  |  | ✓ |

**Notes:**

✓: the outcome is measured in Monocular and Binocular;

✓ Monocular: the outcome is measured in Monocular, only;

✓ Binocular: the outcome is measured in Binocular, only.

**Supplementary Table 2** Methods and available program for visual disturbances and distortions detection

| Methods for visual disturbances and distortions detection | A specific software (Halo v1.0 software, Laboratory of Vision Sciences and Applications, University of Granada, Spain) was used by Investigator to test the presence of visual disturbances under low illumination. The test consists of discriminating peripheral luminous stimuli of 2 pixels around a more luminous central target of 24 pixels. The central stimulus causes intraocular scattering and retinal reflection in the patient’s eye, depending on the state of the retina and ocular media. The discrimination capacity of peripheral stimuli in the presence of visual disturbances is assessed by the disturbance index. The index is calculated as a ratio between non detected stimuli and all the peripheral stimuli presented to the observer. |
| --- | --- |
| Available program used to evaluate the halos | downloaded for free from <http://www.ugr.es/~labvisgr/>) |

**Supplementary Table 3** Percentage of answers for each item in the Visual Function Questionnaire VF-11R (VF-11R) at 2 years. The patients indicated whether they experienced difficulties, even with glasses, in performing the following 12 tasks

|  | Question | Answer | % |
| --- | --- | --- | --- |
| Do you have difficulties, even with glasses… | 1. Reading small print, such as labels on medicine bottles, a telephone book, food | No | 56.52 |
| A little | 26.09 |
| A moderate amount | 17.39 |
| A great deal | 0.00 |
| Unable to do the activity | 0.00 |
| 2. Reading a newspaper or a book | No | 69.57 |
| A little | 13.04 |
| A moderate amount | 17.39 |
| A great deal | 0.00 |
| Unable to do the activity | 0.00 |
| 3. Reading a large-print book or a large-print newspaper or numbers on a telephone | No | 73.91 |
| A little | 8.70 |
| A moderate amount | 8.70 |
| A great deal | 8.70 |
| Unable to do the activity | 0.00 |
| 4. Recognizing people when they are close to you | No | 73.91 |
| A little | 8.70 |
| A moderate amount | 4.35 |
| A great deal | 13.04 |
| Unable to do the activity | 0.00 |
| 5. Seeing steps, stairs or curbs | No | 73.91 |
| A little | 13.04 |
| A moderate amount | 8.70 |
| A great deal | 4.35 |
| Unable to do the activity | 0.00 |
| 6. Reading traffic signs, street signs, or store signs | No | 73.91 |
| A little | 8.70 |
| A moderate amount | 17.39 |
| A great deal | 0.00 |
| Unable to do the activity | 0.00 |
| 7. Doing fine handwork like sewing, knitting, crocheting, carpentry | No | 56.52 |
| A little | 30.43 |
| A moderate amount | 8.70 |
| A great deal | 4.35 |
| Unable to do the activity | 0.00 |
| 8. Writing checks or filling out forms | No | 65.22 |
| A little | 13.04 |
| A moderate amount | 13.04 |
| A great deal | 8.70 |
| Unable to do the activity | 0.00 |
| 9. Playing games such as bingo, dominos, card games, mah-jong | No | 73.91 |
| A little | 4.35 |
| A moderate amount | 8.70 |
| A great deal | 13.04 |
| Unable to do the activity | 0.00 |
| 10. Taking part in sports like bowling, handball, tennis, golf | No | 78.26 |
| A little | 4.35 |
| A moderate amount | 13.04 |
| A great deal | 0.00 |
| Unable to do the activity | 4.35 |
| 11. Cooking | No | 69.57 |
| A little | 8.70 |
| A moderate amount | 17.39 |
| A great deal | 4.35 |
| Unable to do the activity | 0.00 |
| 12. Watching television | No | 69.57 |
| A little | 8.70 |
| A moderate amount | 21.74 |
| A great deal | 0.00 |
| Unable to do the activity | 0.00 |

**Supplementary Table 4** Percentage of answers for each item in the Visual Function Questionnaire VF-11R (VF-11R) at 2 years. The patients indicated whether they experienced difficulties, even with glasses, in performing the following 12 tasks

|  | Question | Mean | SD |
| --- | --- | --- | --- |
| Do you have difficulties, even with glasses… | 1. Reading small print, such as labels on medicine bottles, a telephone book, food | 84.78 | 19.57 |
| 2. Reading a newspaper or a book | 88.04 | 19.76 |
| 3. Reading a large-print book or a large-print newspaper or numbers on a telephone | 86.96 | 24.85 |
| 4. Recognizing people when they are close to you | 85.87 | 27.00 |
| 5. Seeing steps, stairs or curbs | 89.13 | 21.09 |
| 6. Reading traffic signs, street signs, or store signs | 89.13 | 19.69 |
| 7. Doing fine handwork like sewing, knitting, crocheting, carpentry | 84.78 | 20.97 |
| 8. Writing checks or filling out forms | 83.70 | 25.68 |
| 9. Playing games such as bingo, dominos, card games, mah-jong | 84.78 | 27.94 |
| 10. Taking part in sports like bowling, handball, tennis, golf | 88.04 | 25.97 |
| 11. Cooking | 85.87 | 23.63 |
| 12. Watching television | 86.96 | 21.15 |
| Total Average Score | 86.50 |  |


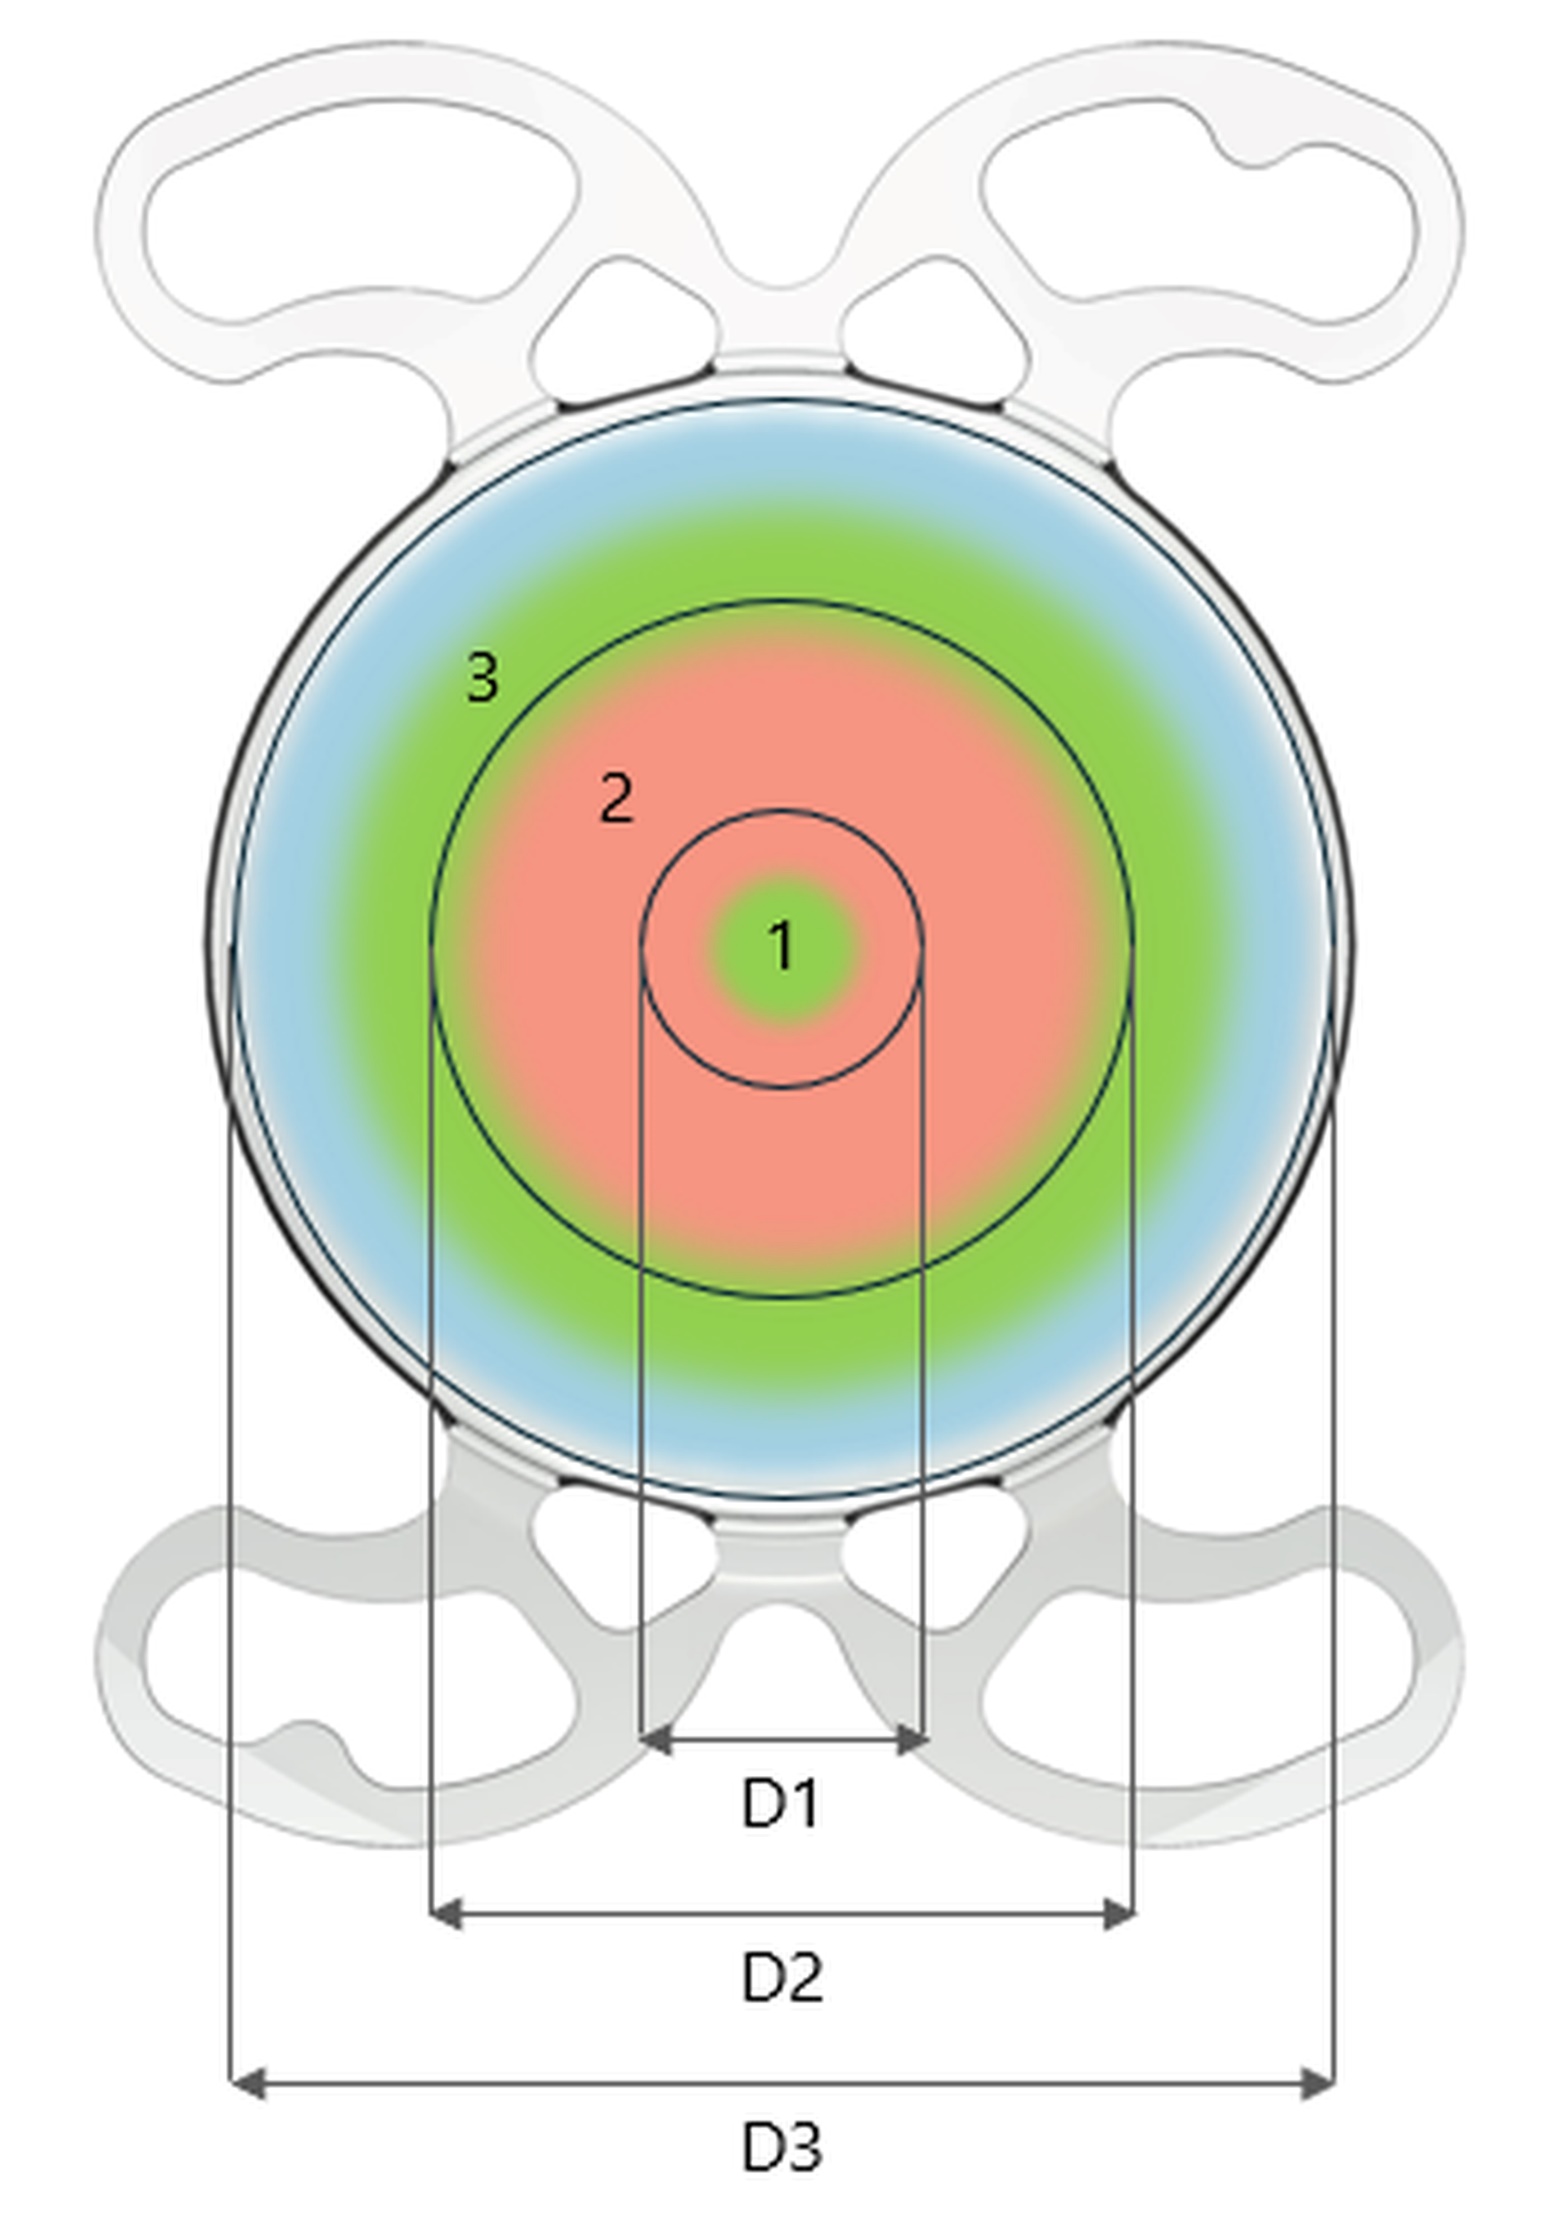


**Supplementary Figure 1** Intraocular lens (IOL) Mini WELL (SIFI S.p.A., Catania, Italy), an aspheric progressive extended depth-of-focus (EDoF) IOL designed for continuous vision in the range of infinity to near (40 cm) distance.

**Abbreviations:** D1, central distance zone; D2, surrounding distance zone with spherical aberration of the opposite sign; D3, peripheral distance zone.


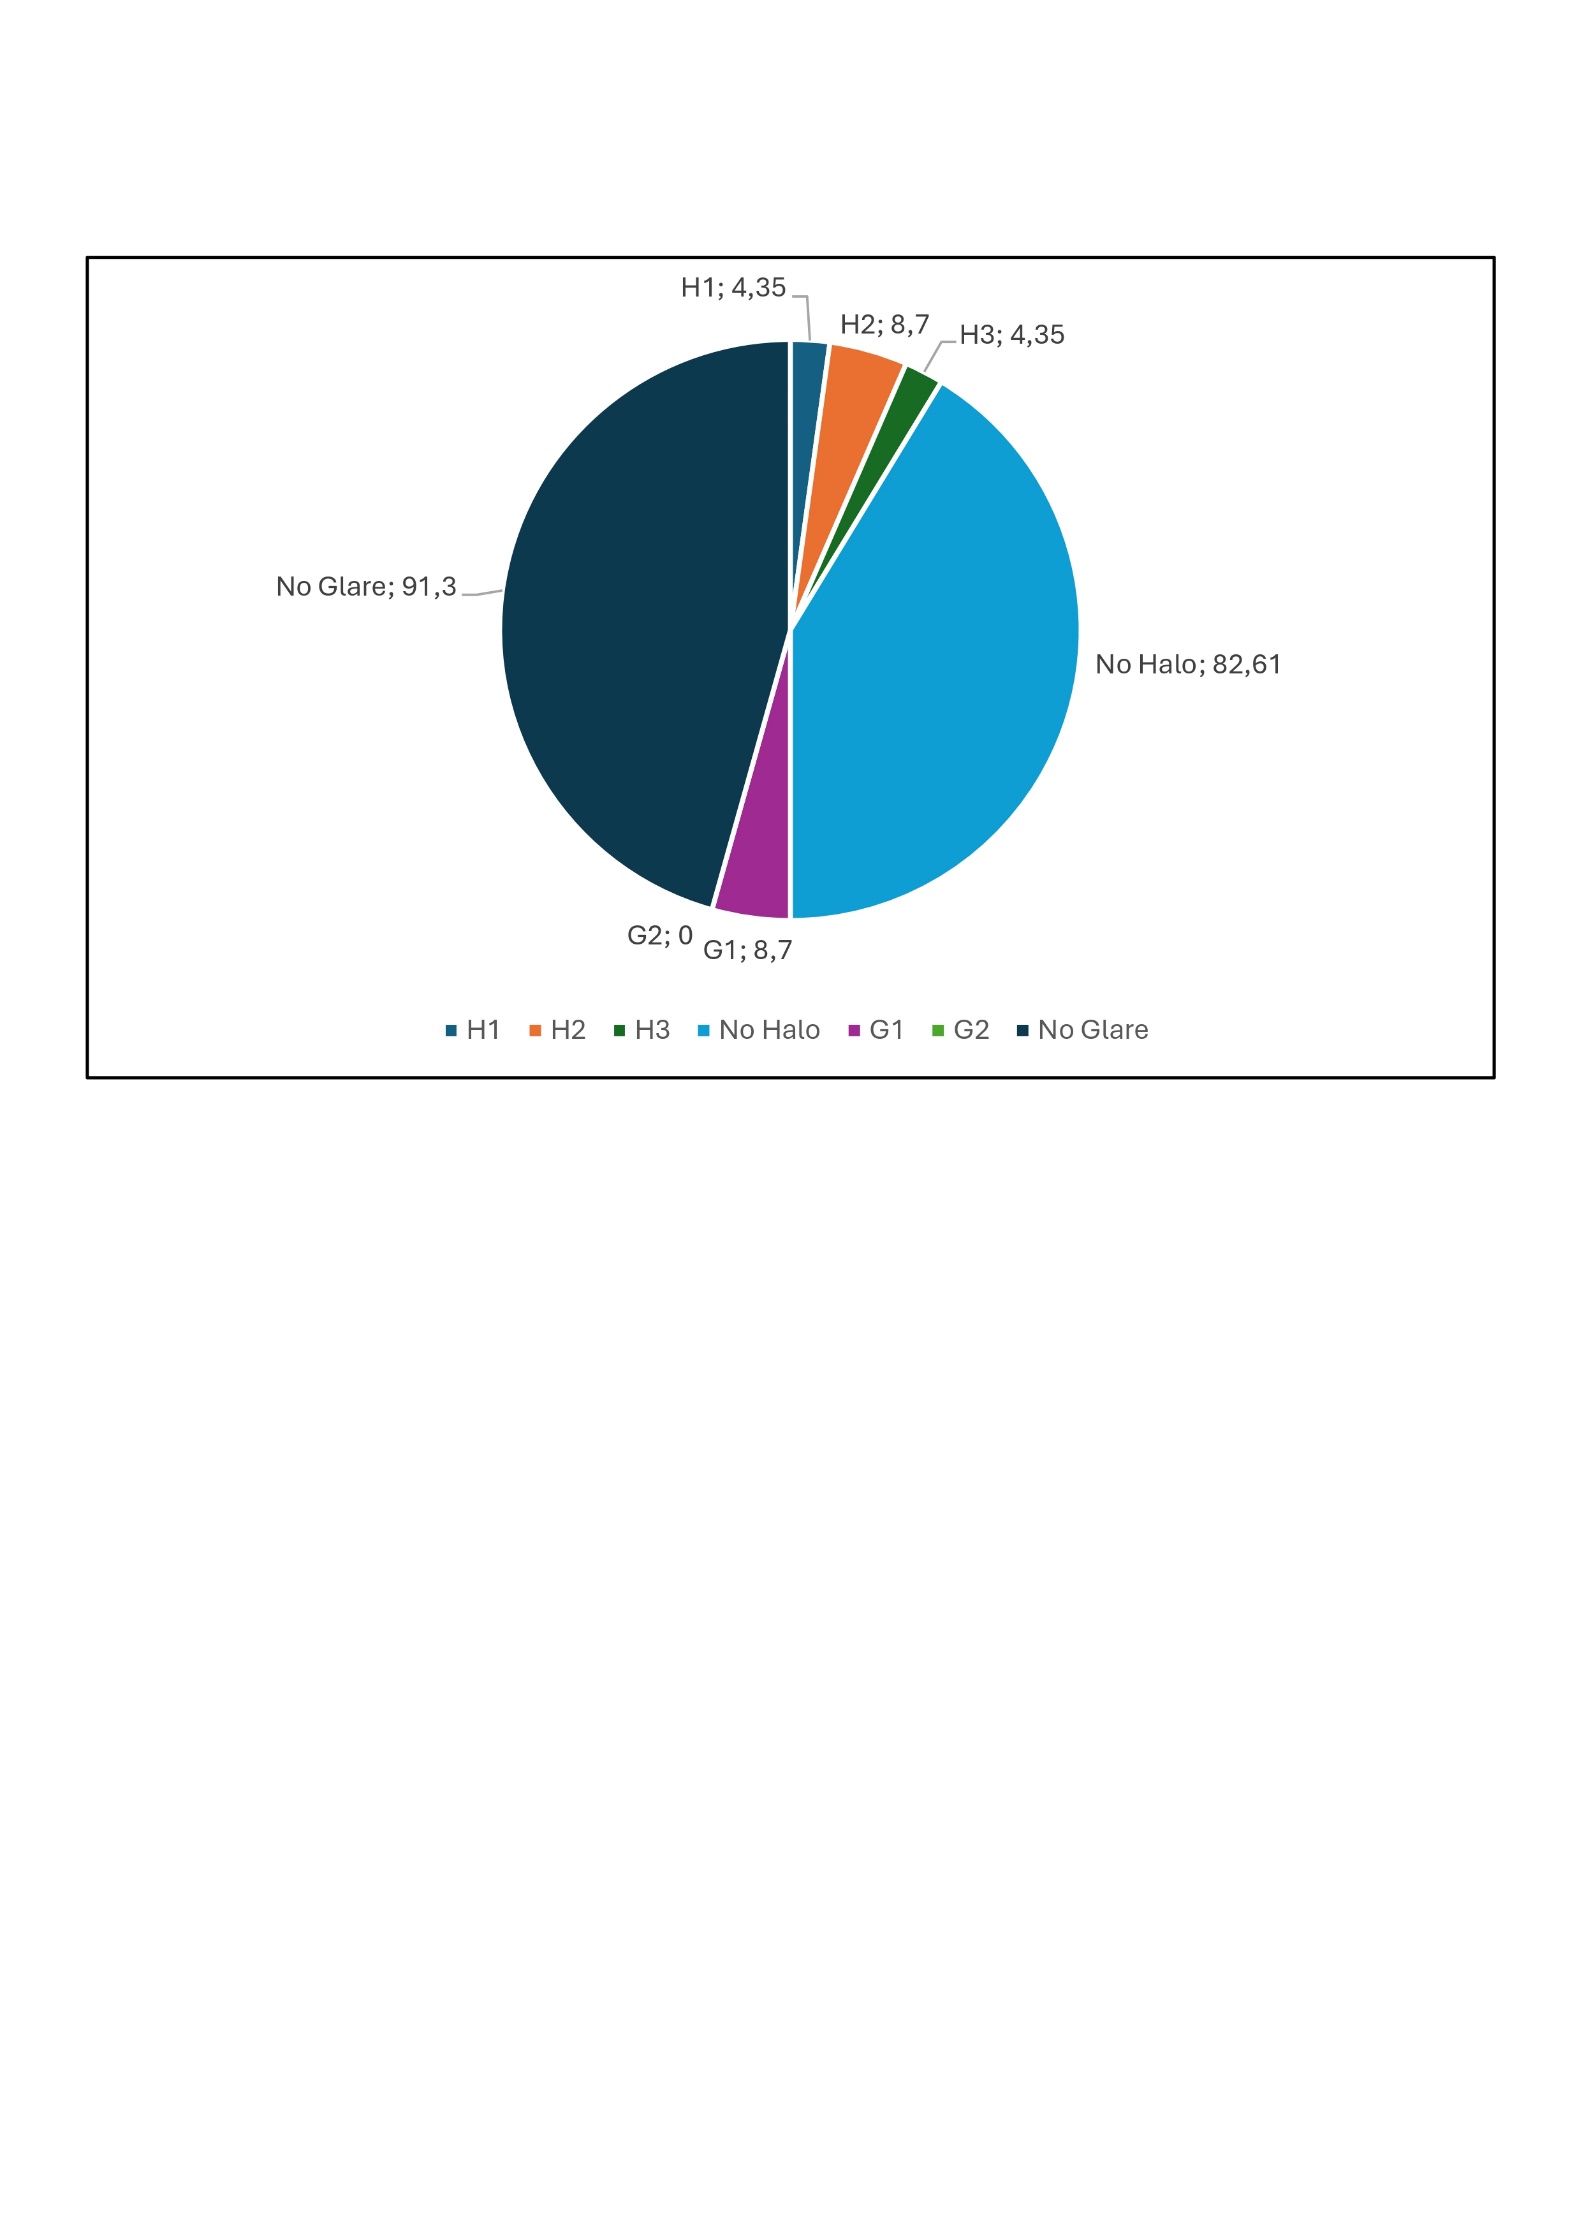


**Supplementary Figure 2** Photic phenomenon assessment at the two-year follow-up.

**Abbreviations:** H1, diffuse halo ring; H2, starburst type; H3, distinct halo ring; G1, diffuse glare; G2, irregularly shaped glare.
